# Supplementary material for: Antiaromaticity-promoted radical anion stability in α-vinyl heterocyclics
Source: Royal Society of Chemistry journal article supplement (doi:10.1039/d1qo01944a), 2022-01-01
Supplement: d1qo01944a1.pdf [file d1qo01944a1.pdf]

## Supporting Information

### **Antiaromaticity-Promoted Radical Anion Stability in $\alpha$ -Vinyl Heterocyclics**

Lu Lin,<sup>a</sup> and Jun Zhu<sup>\*a</sup>

<sup>a</sup> State Key Laboratory of Physical Chemistry of Solid Surfaces, Fujian Provincial Key Laboratory of Theoretical and Computational Chemistry, Department of Chemistry, College of Chemistry and Chemical Engineering, Xiamen University, Xiamen 361005, People's Republic of China

Correspondence and requests for materials should be addressed to J.Z. (email: jun.zhu@xmu.edu.cn).

**Table S1.** NICS(1)<sub>zz</sub> (ppm) and RSE values (kcal/mol) of compounds **1-18** and their corresponding radical anions.

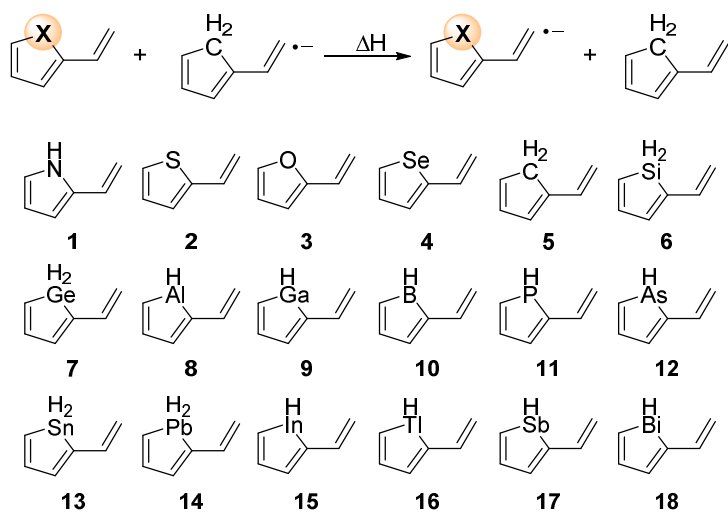

|                                       | <b>1</b>  | <b>2</b>  | <b>3</b>  | <b>4</b>  | <b>5</b>  | <b>6</b>  | <b>7</b>  | <b>8</b>  | <b>9</b>  |
|---------------------------------------|-----------|-----------|-----------|-----------|-----------|-----------|-----------|-----------|-----------|
| <b>NICS(1)<sub>zz,original</sub></b>  | -26.2     | -22.3     | -23.4     | -17.5     | -8.6      | 2.2       | 1.7       | 11.6      | 12.0      |
| <b>NICS(1)<sub>zz,rad.anion</sub></b> | -19.3     | -8.9      | -15.9     | -7.5      | -4.3      | -0.2      | -0.6      | -2.3      | -2.2      |
| <b>RSE</b>                            | 11.5      | 1.6       | 6.7       | -1.8      | 0.0       | -15.8     | -13.4     | -24.2     | -23.9     |
|                                       | <b>10</b> | <b>11</b> | <b>12</b> | <b>13</b> | <b>14</b> | <b>15</b> | <b>16</b> | <b>17</b> | <b>18</b> |
| <b>NICS(1)<sub>zz,original</sub></b>  | 35.3      | -9.8      | -5.1      | 2.7       | 1.1       | 9.5       | 7.5       | -1.5      | 0.3       |
| <b>NICS(1)<sub>zz,rad.anion</sub></b> | 5.6       | -6.6      | -4.7      | -0.1      | -0.6      | -1.6      | -1.2      | -3.2      | -2.7      |
| <b>RSE</b>                            | -35.7     | -9.9      | -10.7     | -14.5     | -12.9     | -22.5     | -20.7     | -13.3     | -12.9     |

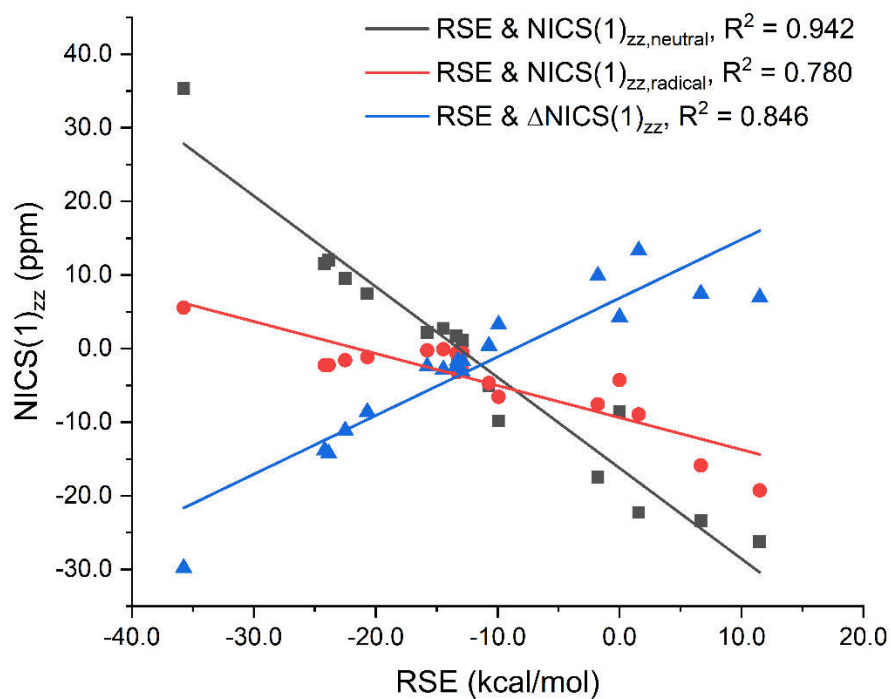

**Figure S1.** Linear correlation between  $\text{NICS}(1)_{zz}$  values and RSE values,  $\Delta\text{NICS}(1)_{zz} = \text{NICS}(1)_{zz,\text{radical}} - \text{NICS}(1)_{zz,\text{neutral}}$ .

**Table S2.** RSE values (kcal/mol) of radical anions **1-12** at different computational levels.

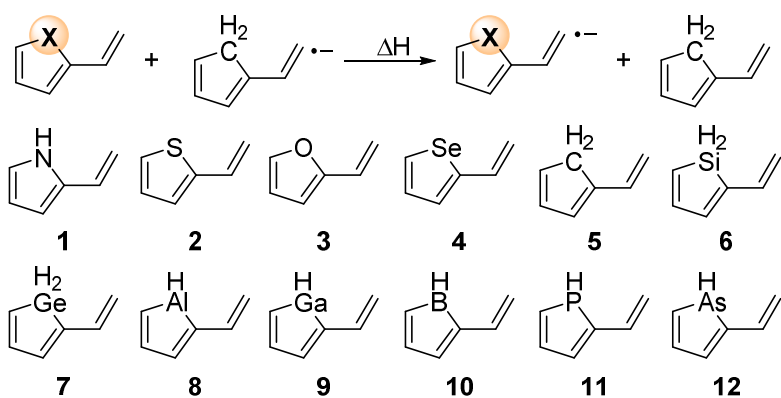

|                        | <b>1</b> | <b>2</b> | <b>3</b> | <b>4</b>  | <b>5</b>  | <b>6</b>  |
|------------------------|----------|----------|----------|-----------|-----------|-----------|
| <b>RSE<sub>a</sub></b> | 11.5     | 1.6      | 6.7      | -1.8      | 0.0       | -15.8     |
| <b>RSE<sub>b</sub></b> | 10.7     | 1.8      | 9.2      | -1.1      | 0.0       | -14.3     |
| <b>RSE<sub>c</sub></b> | 16.4     | 1.7      | 9.9      | -1.4      | 0.0       | -17.2     |
|                        | <b>7</b> | <b>8</b> | <b>9</b> | <b>10</b> | <b>11</b> | <b>12</b> |
| <b>RSE<sub>a</sub></b> | -13.4    | -24.2    | -23.9    | -35.7     | -9.9      | -10.7     |
| <b>RSE<sub>b</sub></b> | -11.6    | -24.2    | -21.8    | -36.4     | -9.3      | -9.3      |
| <b>RSE<sub>c</sub></b> | -15.3    | -26.0    | -25.4    | -37.8     | -10.3     | -12.1     |

a. (U)OPBE/6-311++G(d,p)~SDD//B3LYP/6-311G(d,p)~SDD level; b. (U)CCSD(T)/6-311++G(d,p)~SDD//B3LYP/6-311G(d,p)~SDD level; c. (U)OPBE/cc-pvtz//B3LYP/6-311G(d,p)~SDD level.

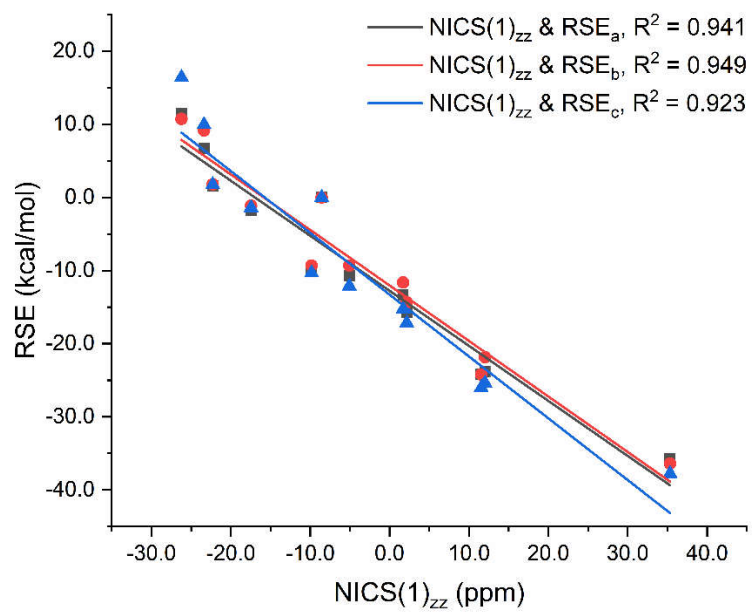

**Figure S2.** Linear correlation between NICS(1)<sub>zz</sub> values and RSE values at different computational levels.

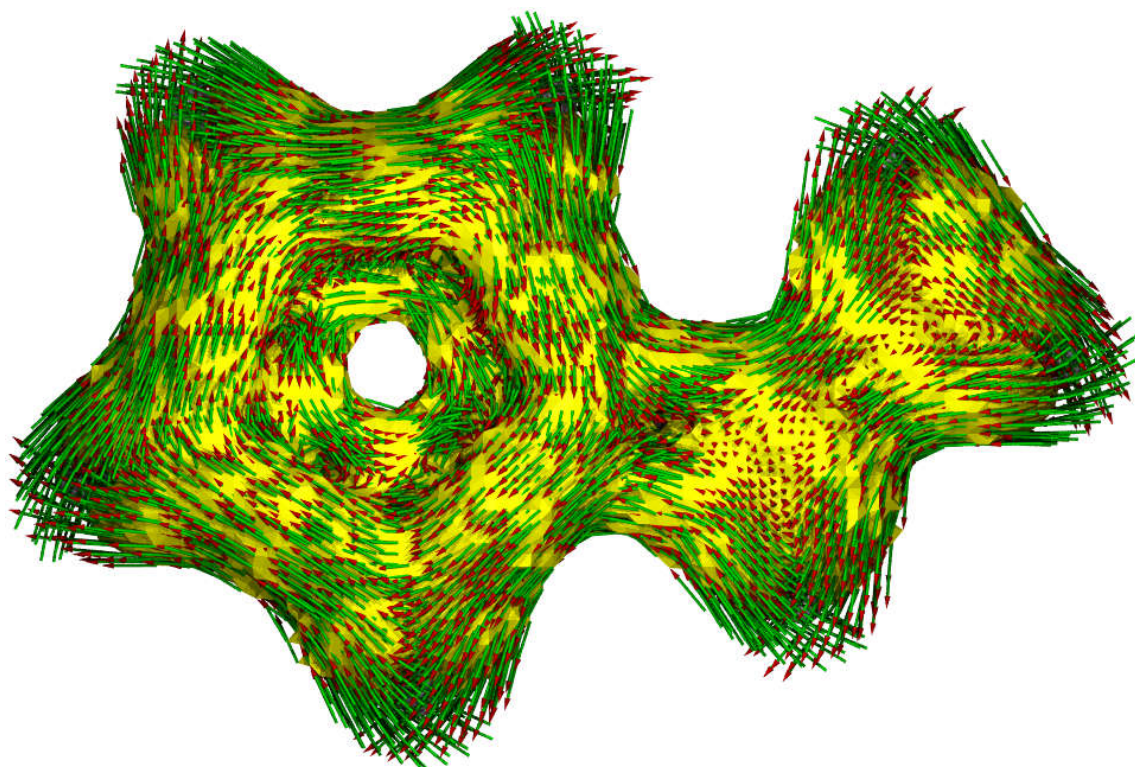

**Figure S3.** Computed ACID plots of **1** with isosurface values of 0.03 a.u. Aromatic species exhibit clockwise ring currents. Antiaromatic species exhibit anticlockwise ring currents.

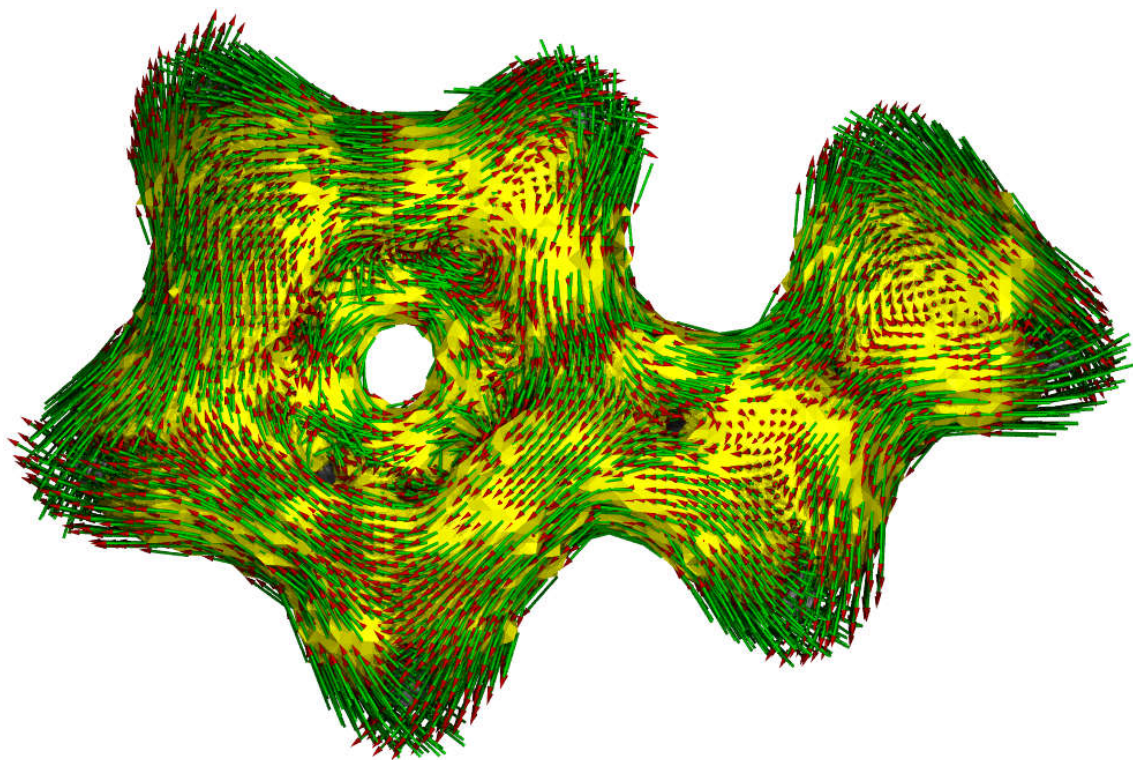

**Figure S4.** Computed ACID plots of **1rad.anion** with isosurface values of 0.03 a.u. Aromatic species exhibit clockwise ring currents. Antiaromatic species exhibit anticlockwise ring currents.



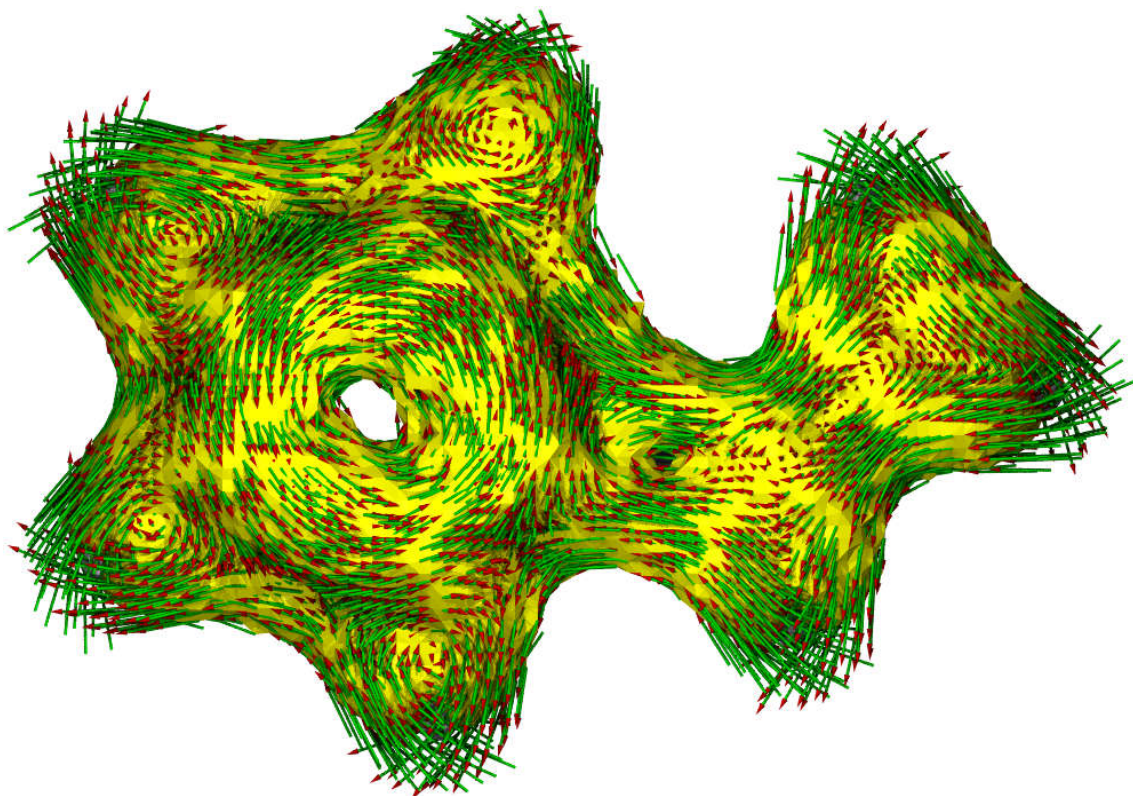

**Figure S5.** Computed ACID plots of **10** with isosurface values of 0.03 a.u. Aromatic species exhibit clockwise ring currents. Antiaromatic species exhibit anticlockwise ring currents.



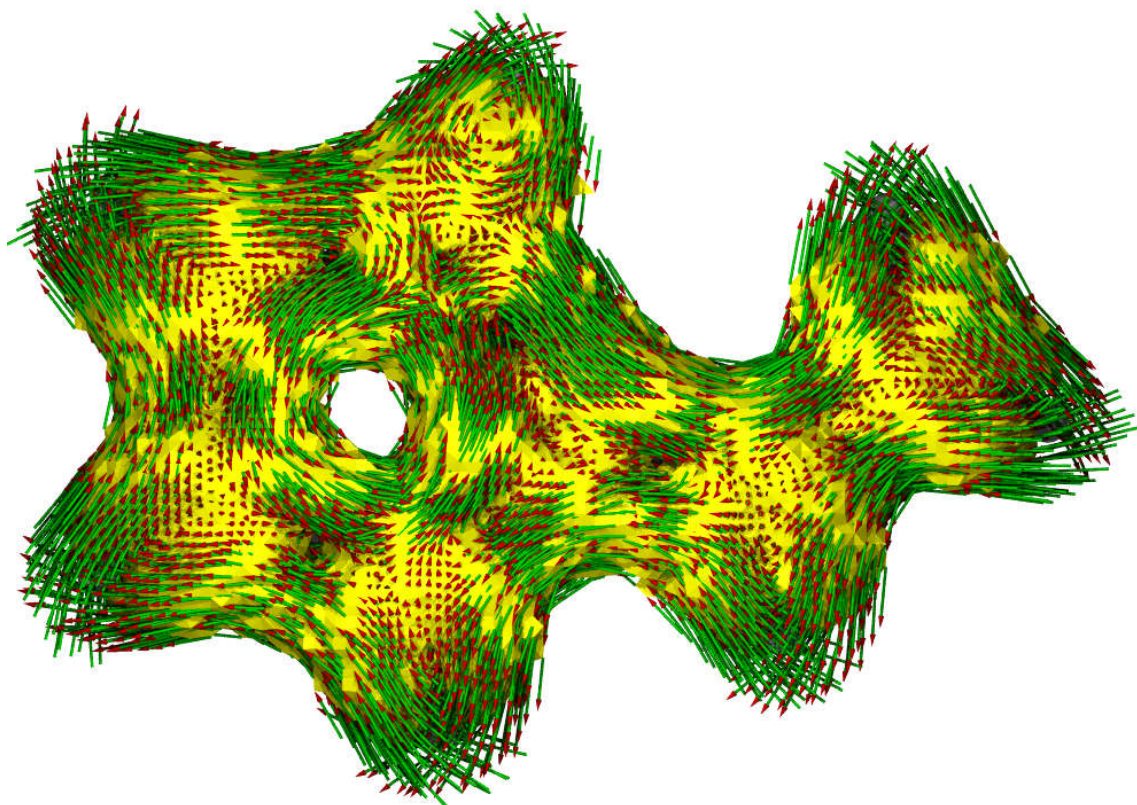

**Figure S6.** Computed ACID plots of **10rad.anion** with isosurface values of 0.03 a.u. Aromatic species exhibit clockwise ring currents. Antiaromatic species exhibit anticlockwise ring currents.

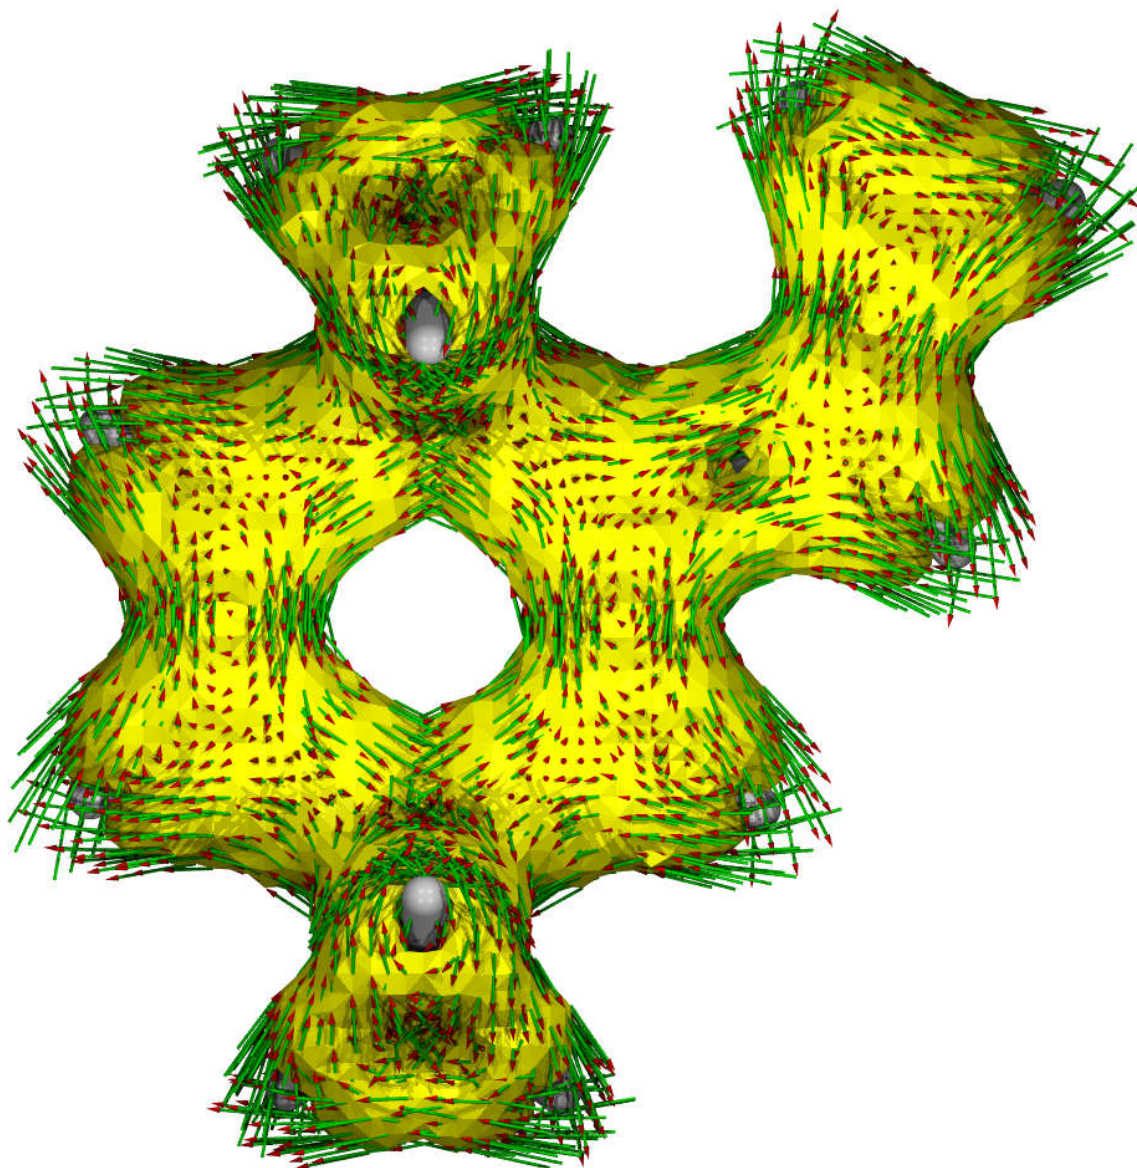

**Figure S7.** Computed ACID plots of **19** with isosurface values of 0.03 a.u. Aromatic species exhibit clockwise ring currents. Antiaromatic species exhibit anticlockwise ring currents.



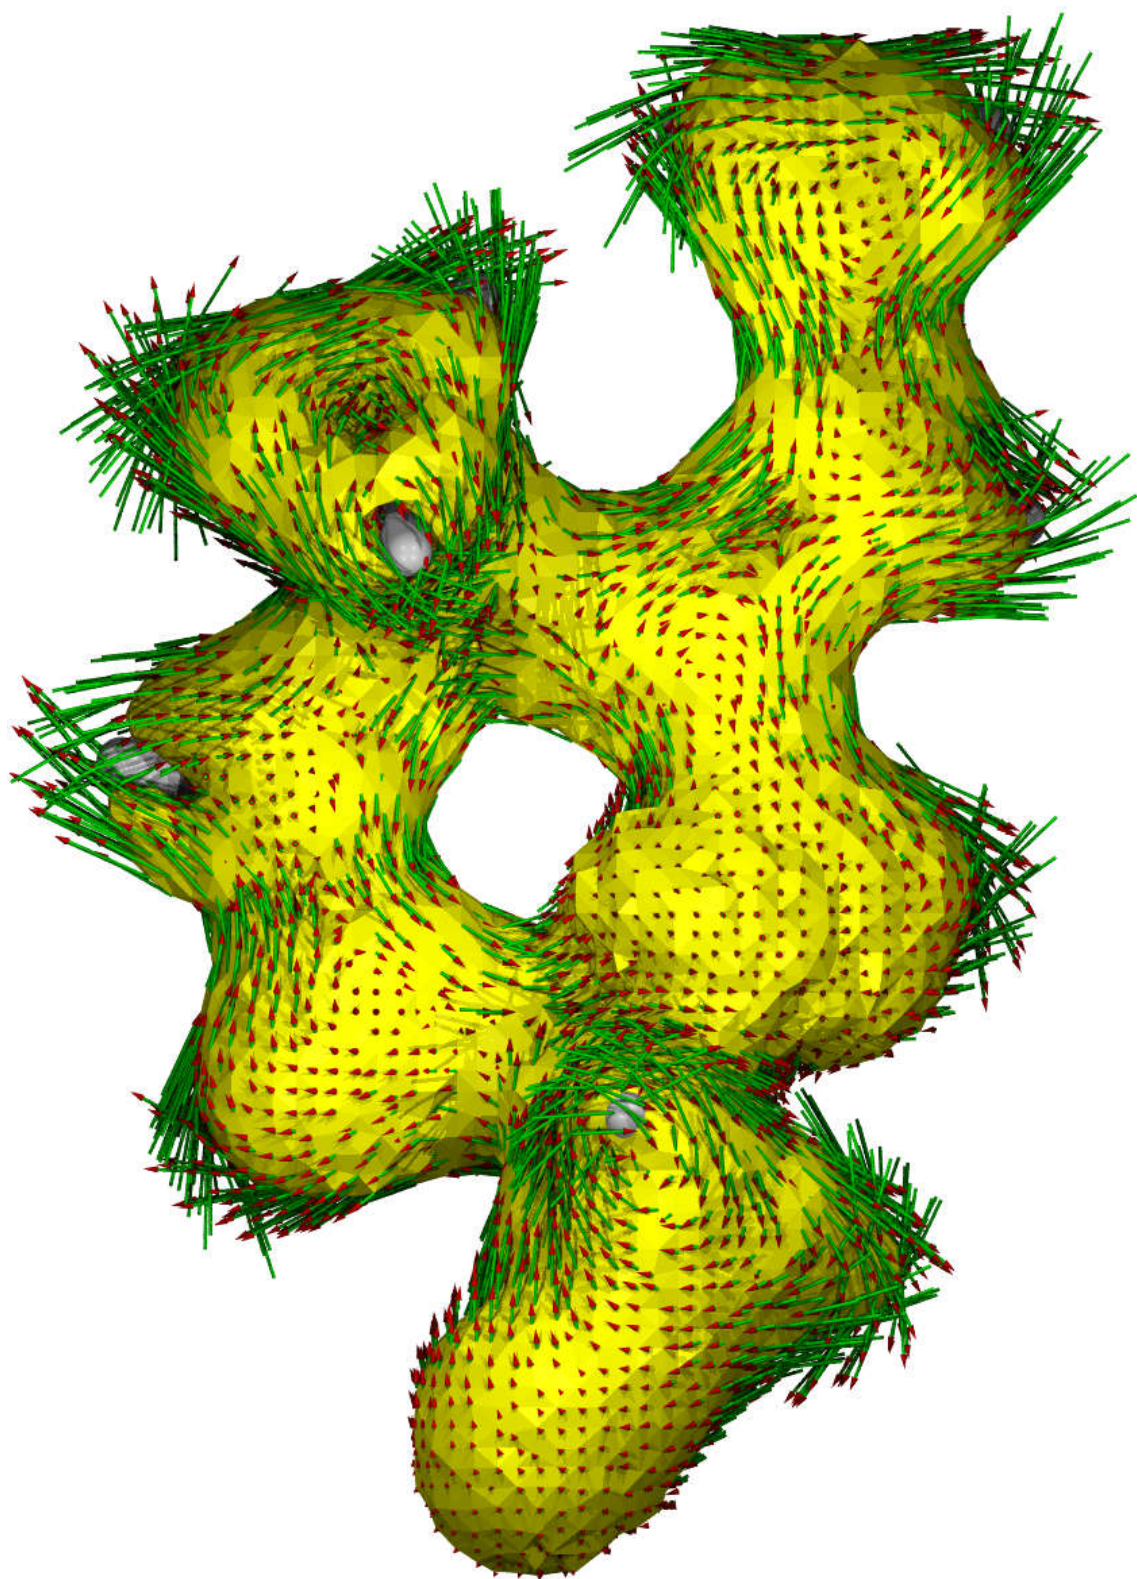

**Figure S8.** Computed ACID plots of **19rad.anion** with isosurface values of 0.03 a.u. Aromatic species exhibit clockwise ring currents. Antiaromatic species exhibit anticlockwise ring currents.

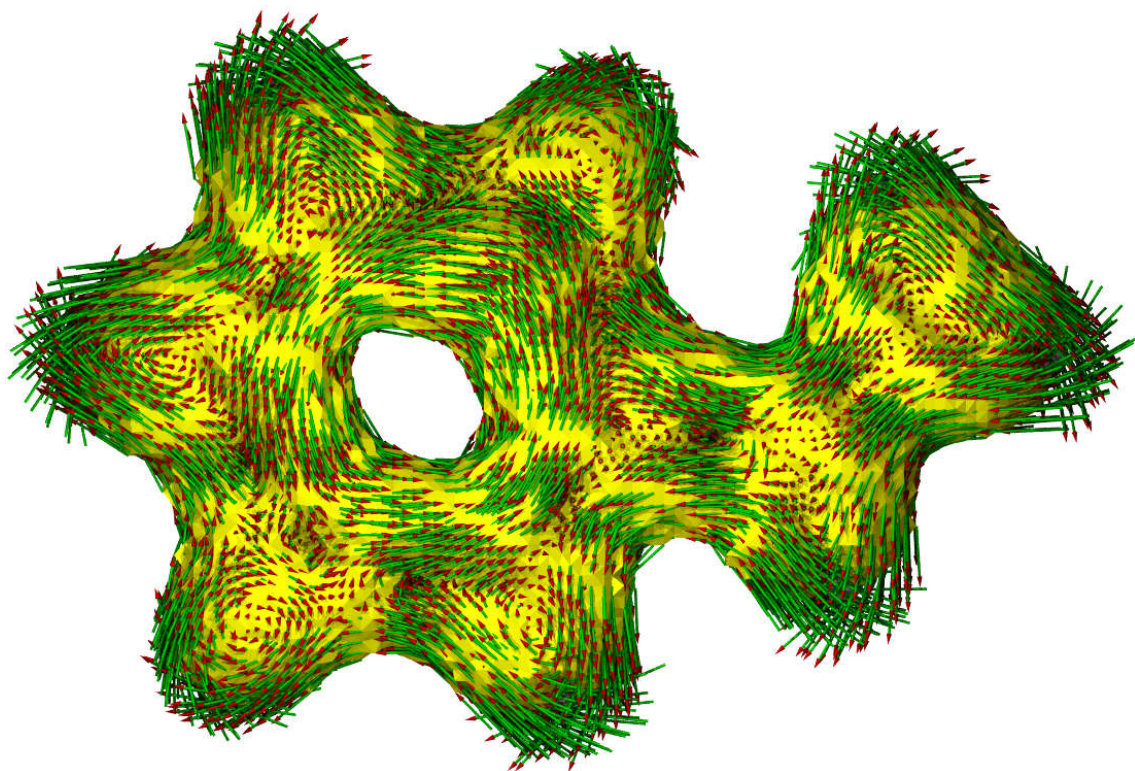

**Figure S9.** Computed ACID plots of **20** with isosurface values of 0.03 a.u. Aromatic species exhibit clockwise ring currents. Antiaromatic species exhibit anticlockwise ring currents.



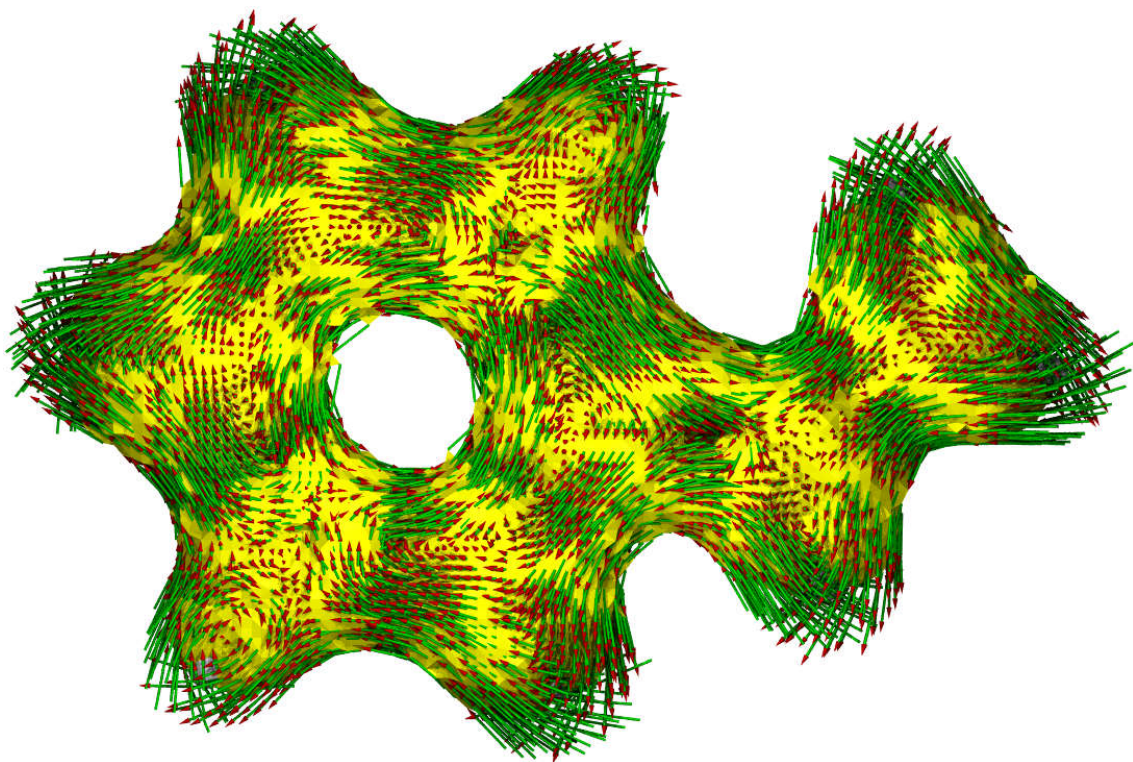

**Figure S10.** Computed ACID plots of **20rad.anion** with isosurface values of 0.03 a.u. Aromatic species exhibit clockwise ring currents. Antiaromatic species exhibit anticlockwise ring currents.

## Cartesian Coordinates of Models Described in the Text.

**1**

**The number of imaginary frequencies is 0**

**E (OPBE) = -287.5310483 a.u.**

C -0.23338700 0.28243100 0.00000400  
C 0.82943500 1.17588800 0.00000000  
H 0.73354900 2.25099100 0.00000200  
C 1.68503200 -0.90476600 -0.00000900  
H 2.29522300 -1.79352500 -0.00001400  
C 2.03352700 0.42908700 -0.00000100  
H 3.03945900 0.81823200 0.00000000  
N 0.31706300 -0.98343500 -0.00000500  
H -0.21073500 -1.83964100 -0.00000600  
C -1.65415700 0.55495700 0.00001000  
H -1.89635500 1.61418600 0.00002200  
C -2.65892400 -0.33056500 0.00000100  
H -3.69087600 -0.00406700 0.00000600  
H -2.49886400 -1.40431700 -0.00001100

**1.rad.anion**

**The number of imaginary frequencies is 0**

**E (OPBE) = -287.5069998 a.u.**

C -0.24717100 0.34094600 0.02690000  
C 0.89271000 1.18857300 0.03567000  
H 0.86202000 2.27018400 0.05114200  
C 1.66254400 -0.95054000 -0.05397300  
H 2.24775600 -1.85458800 0.04483400  
C 2.04923800 0.37547800 -0.00882100  
H 3.07587300 0.72367800 0.01979300  
N 0.25368400 -0.98359200 0.06124800  
H -0.29212200 -1.68029900 -0.43377200  
C -1.62974500 0.59995900 -0.03602300  
H -1.89864400 1.64477500 -0.19347000  
C -2.65926600 -0.35608300 -0.00192000  
H -3.69899300 -0.04816700 -0.06394200  
H -2.48153600 -1.36043800 0.37568400

**2**

**The number of imaginary frequencies is 0**

**E (OPBE) = -630.3565388 a.u.**

C -0.37627000 0.43025700 0.00000300  
C 0.61074900 1.38803700 0.00000600  
H 0.38853000 2.44772800 0.00001300  
C 1.94281400 -0.50912300 -0.00000700

H 2.79333900 -1.17313000 -0.00001300  
C 1.92882700 0.85538400 0.00000000  
H 2.82595100 1.46005300 0.00000000  
C -1.80933700 0.66727400 0.00000800  
H -2.07795500 1.72126000 0.00001400  
C -2.78646900 -0.24513600 0.00000500  
H -3.82703700 0.05367800 0.00000900  
H -2.58522600 -1.31109400 -0.00000100  
S 0.33878200 -1.16991600 -0.00000700

**2.rad.anion**

**The number of imaginary frequencies is 0**

**E (OPBE) = -630.3493881 a.u.**

C -0.39986900 0.46569800 0.00000300  
C 0.66073000 1.40819600 0.00000600  
H 0.46720800 2.47595500 0.00001200  
C 1.97136700 -0.53772500 -0.00000800  
H 2.81756600 -1.20676800 -0.00001300  
C 1.94405000 0.84628900 0.00000000  
H 2.85260900 1.44321000 0.00000100  
C -1.78922900 0.68152900 0.00000800  
H -2.06311600 1.73953600 0.00001400  
C -2.82596100 -0.23497300 0.00000500  
H -3.85941800 0.09400000 0.00000900  
H -2.64625900 -1.30499400 0.00000000  
S 0.31655500 -1.18843900 -0.00000700

**3**

**The number of imaginary frequencies is 0**

**E (OPBE) = -307.3753266 a.u.**

C -0.21766400 0.32156700 0.00000200  
C 0.85703400 1.17071000 0.00000200  
H 0.81042800 2.24828200 0.00000700  
C 1.58946100 -0.93243700 -0.00001000  
H 2.08663700 -1.88766800 -0.00001700  
C 2.02902000 0.35356400 0.00000100  
H 3.05707600 0.67865000 0.00000400  
C -1.64121500 0.56575700 0.00000700  
H -1.91308500 1.61725300 0.00001300  
C -2.59624700 -0.37022800 0.00000400  
H -3.64401800 -0.09793600 0.00000700  
H -2.35371200 -1.42603100 -0.00000200  
O 0.22929300 -0.97326800 -0.00000700

### 3.rad.anion

The number of imaginary frequencies is 0

E (OPBE) = -307.3591149 a.u.

C -0.23911000 0.33110800 0.00032600  
C 0.89365400 1.18022600 0.00051200  
H 0.86506900 2.26043800 -0.00108100  
C 1.61822500 -0.94991600 -0.00090900  
H 2.12159100 -1.90246000 0.00249500  
C 2.04064700 0.35491700 -0.00023100  
H 3.07398300 0.68004400 -0.00041400  
C -1.61976600 0.56888000 -0.00008100  
H -1.87807400 1.62843800 -0.00000300  
C -2.66418700 -0.36000300 0.00070200  
H -3.69874200 -0.03288200 -0.00338300  
H -2.47312800 -1.42668400 -0.00151700  
O 0.22656500 -0.99477000 0.00024800

### 4

The number of imaginary frequencies is 0

E (OPBE) = -241.5662565 a.u.

C -0.56929600 0.71556300 -0.00013000  
C 0.32125100 1.75370400 0.00012000  
H -0.01763800 2.78352100 0.00023800  
C 1.96058100 0.06841000 -0.00006400  
H 2.91866200 -0.42768800 -0.00008800  
C 1.70588700 1.40165200 -0.00027600  
H 2.49701100 2.14167000 -0.00039000  
C -2.01403000 0.81909300 -0.00014900  
H -2.38000700 1.84434100 -0.00013000  
C -2.90490700 -0.17835500 -0.00014800  
H -3.96855800 0.02297700 -0.00013700  
H -2.60711500 -1.22159700 -0.00013700  
Se 0.36943300 -0.95951800 0.00013300

### 4.rad.anion

The number of imaginary frequencies is 0

E (OPBE) = -241.5646113 a.u.

C -0.58878600 0.76152700 0.00025300  
C 0.38758100 1.78134400 0.00012900  
H 0.08471600 2.82485600 0.00001400  
C 2.00358500 0.03316700 0.00039600  
H 2.95463300 -0.47521400 0.00050100  
C 1.73541200 1.38709000 0.00010200

H 2.54287000 2.11695600 -0.00002900  
C -1.98766800 0.84823000 0.00029400  
H -2.35396000 1.87919900 0.00043500  
C -2.94192800 -0.15159800 0.00017900  
H -3.99962000 0.08713800 0.00022900  
H -2.67144600 -1.20239500 0.00002100  
Se 0.34687200 -0.97615000 -0.00027300

### 5

The number of imaginary frequencies is 0

E (OPBE) = -271.4624510 a.u.

C 0.26957400 0.27147400 -0.00000200  
C -0.73542800 1.18636700 -0.00000300  
H -0.60291100 2.26148600 -0.00000900  
C -1.83322500 -0.82356700 0.00000900  
H -2.59454400 -1.59155200 0.00001500  
C -2.02873600 0.50941200 0.00000000  
H -2.98585300 1.01499200 -0.00000200  
C 1.68927800 0.55856700 -0.00000700  
H 1.94697900 1.61586200 -0.00001300  
C 2.68152700 -0.34178400 -0.00000500  
H 3.71986600 -0.03374700 -0.00000800  
H 2.49083400 -1.40965900 0.00000200  
H -0.05219600 -1.69078100 -0.87813500  
H -0.05219200 -1.69077000 0.87815500  
C -0.35465300 -1.10644100 0.00000700

### 5.rad.anion

The number of imaginary frequencies is 0

E (OPBE) = -271.4572554 a.u.

C 0.27545700 0.29488000 -0.00000200  
C -0.80833100 1.20347600 -0.00000400  
H -0.71093400 2.28481500 -0.00001000  
C -1.81400800 -0.87293600 0.00000900  
H -2.56400100 -1.65516300 0.00001500  
C -2.03551900 0.49115300 0.00000000  
H -3.01652600 0.96151900 -0.00000100  
C 1.65539100 0.57005900 -0.00000700  
H 1.91355300 1.63358900 -0.00001300  
C 2.71350400 -0.32009200 -0.00000400  
H 3.74122500 0.02944600 -0.00000800  
H 2.55956200 -1.39475000 0.00000200  
H 0.03098200 -1.69478000 -0.87625300  
H 0.03098500 -1.69476900 0.87627400



C -0.31730200 -1.11152400 0.00000700

## 6

**The number of imaginary frequencies is 0**

**E (OPBE) = -522.8065937 a.u.**

C 0.47768900 0.41498200 -0.00000300  
C -0.45794200 1.39891700 -0.00000600  
H -0.19536000 2.45488100 -0.00001300  
C -2.14252800 -0.32755700 0.00000700  
H -3.15167500 -0.71891400 0.00001200  
C -1.87604200 0.99474500 0.00000000  
H -2.64901600 1.75933000 -0.00000200  
C 1.90638400 0.66416300 -0.00000900  
H 2.20750200 1.71176500 -0.00001500  
C 2.86335000 -0.27340100 -0.00000600  
H 3.91386700 -0.00905100 -0.00001100  
H 2.62836900 -1.33314000 0.00000000  
H -0.25024300 -2.05189000 -1.20398100  
H -0.25023600 -2.05187700 1.20400400  
Si -0.49133400 -1.21372900 0.00000800

## 6rad.anion

**The number of imaginary frequencies is 0**

**E (OPBE) = -522.8275171 a.u.**

C 0.47259100 0.40232700 -0.00002300  
C -0.51204600 1.41860000 0.00006200  
H -0.24134900 2.47513000 0.00006600  
C -2.13351100 -0.36734600 0.00008800  
H -3.14379300 -0.76110700 0.00010200  
C -1.86956300 1.00594000 -0.00013500  
H -2.66782600 1.74986400 -0.00023700  
C 1.87329400 0.64812800 -0.00003400  
H 2.15318800 1.70897100 0.00028000  
Si -0.48795700 -1.20759000 0.00009800  
H -0.20225300 -2.12955000 1.16792100  
H -0.20222300 -2.12966700 -1.16762600  
C 2.91071200 -0.23976300 -0.00019000  
H 3.94187100 0.09868000 -0.00007400  
H 2.74492400 -1.31336900 -0.00040400

## 7

**The number of imaginary frequencies is 0**

**E (OPBE) = -237.1705130 a.u.**

C 0.68780900 0.67759700 -0.00000700

C -0.14020500 1.74882300 -0.00001200

H 0.24069100 2.76810400 -0.00001900

C -2.05334200 0.26002900 -0.00000300

H -3.10549800 0.00803600 -0.00000300

C -1.59734000 1.52509300 0.00000500

H -2.25963800 2.38738400 0.00000700

C 2.13247400 0.76291100 -0.00001200

H 2.54749700 1.77126700 -0.00002100

C 2.98098800 -0.27384500 -0.00000900

H 4.05408200 -0.12655400 -0.00001500

H 2.62937500 -1.30071100 -0.00000100

H -0.34861200 -1.82834500 -1.25718000

H -0.34860400 -1.82833000 1.25720600

Ge -0.48348700 -0.93920300 0.00000800

## 7rad.anion

**The number of imaginary frequencies is 0**

**E (OPBE) = -237.1873968 a.u.**

C 0.68161700 0.67326000 -0.00000600

C -0.20761300 1.76783400 -0.00000100

H 0.16778600 2.79163000 -0.00000400

C -2.06264700 0.19965300 0.00001300

H -3.11220900 -0.06722600 0.00002100

C -1.60565600 1.51364000 -0.00001400

H -2.30022900 2.35547100 -0.00002200

C 2.09467700 0.75861500 -0.00001100

H 2.48701800 1.78350800 -0.00001300

C 3.03265900 -0.23768300 -0.00001100

H 4.09382300 -0.01142600 -0.00001200

H 2.75101300 -1.28674200 -0.00000800

H -0.29699100 -1.91879600 -1.22084500

H -0.29698400 -1.91878400 1.22086600

Ge -0.47160800 -0.93061100 0.00000600

## 8

**The number of imaginary frequencies is 0**

**E (OPBE) = -475.1164665 a.u.**

C -0.52189700 0.33812700 0.00000300

C 0.41214100 1.32183200 0.00000600

H 0.14085900 2.37870800 0.00001200

C 2.26750800 -0.30741400 -0.00000800

H 3.32596800 -0.54032600 -0.00001100

C 1.86328400 0.98243000 0.00000000

H 2.56308200 1.81841000 0.00000200

C -1.94503800 0.61533700 0.00000900  
H -2.23897900 1.66681100 0.00001500  
C -2.91354200 -0.31246400 0.00000700  
H -3.96211400 -0.03914500 0.00001100  
H -2.68444000 -1.37370400 0.00000000  
H 0.23200500 -2.83944400 -0.00001700  
Al 0.58837600 -1.29987700 -0.00000900

### **8rad.anion**

**The number of imaginary frequencies is 0**

**E (OPBE) = -475.1521162 a.u.**

C -0.51705900 0.27648100 -0.00009200  
C 0.41188300 1.31905600 0.00018600  
H 0.08242700 2.36374400 0.00036900  
C 2.26604700 -0.28017900 -0.00039300  
H 3.33763500 -0.46804100 -0.00063300  
C 1.82272200 1.03648000 0.00010900  
H 2.51422300 1.88444800 0.00021400  
C -1.92677000 0.57040700 -0.00012500  
H -2.18146100 1.63947700 -0.00013100  
C -2.97442100 -0.28578100 -0.00011800  
H -3.99937000 0.07287900 -0.00013100  
H -2.82671500 -1.36207100 -0.00009300  
H 0.33550900 -2.89059600 0.00052600  
Al 0.63410300 -1.31220200 0.00019100

### **9**

**The number of imaginary frequencies is 0**

**E (OPBE) = -234.8093332 a.u.**

C -0.72496200 0.62218200 0.00021400  
C 0.09755600 1.69547000 -0.00002900  
H -0.28524900 2.71638700 -0.00040900  
C 2.10573800 0.27012000 0.00058000  
H 3.17878100 0.12142400 0.00085400  
C 1.57508600 1.50809700 -0.00002300  
H 2.18949900 2.40783800 -0.00036200  
C -2.16866600 0.72026100 0.00024800  
H -2.58780500 1.72848500 0.00029600  
C -3.01846800 -0.31733300 0.00021100  
H -4.09216500 -0.17181900 0.00024000  
H -2.66212400 -1.34271400 0.00015000  
H 0.34798900 -2.52380700 -0.00066300  
Ga 0.53914100 -0.96543800 -0.00023600

### **9rad.anion**

**The number of imaginary frequencies is 0**

**E (OPBE) = -234.8444494 a.u.**

C -0.72962600 0.55504200 0.00004100  
C 0.07368500 1.69112900 -0.00003400  
H -0.37017300 2.69182900 -0.00009400  
C 2.08657300 0.30729200 0.00007800  
H 3.17034300 0.21460600 0.00011900  
C 1.50780800 1.56380800 0.00002100  
H 2.10624400 2.47919300 0.00000300  
C -2.16237000 0.66186500 0.00005300  
H -2.55164500 1.68986600 0.00005500  
C -3.09276000 -0.32122700 0.00005300  
H -4.15492200 -0.09580800 0.00005800  
H -2.80734500 -1.36931000 0.00004600  
H 0.45765500 -2.55564000 -0.00012800  
Ga 0.58225800 -0.96136100 -0.00004300

### **10**

**The number of imaginary frequencies is 0**

**E (OPBE) = -257.5634036 a.u.**

C -0.30634900 -0.21599900 -0.00000200  
C 0.68473700 -1.13591400 -0.00000500  
H 0.55551700 -2.21441600 -0.00001100  
C 1.96573900 0.85783700 0.00000900  
H 2.83404500 1.50365700 0.00001400  
C 2.03811800 -0.48935400 0.00000300  
H 2.95070200 -1.07966200 0.00000200  
C -1.72271900 -0.51252400 -0.00000600  
H -1.99943300 -1.56655500 -0.00001300  
C -2.70155600 0.40549200 -0.00000400  
H -3.74578500 0.11638700 -0.00000800  
H -2.48449600 1.46763400 0.00000200  
H -0.06288500 2.28363300 0.00001300  
B 0.44090200 1.20641900 0.00000800

### **10rad.anion**

**The number of imaginary frequencies is 0**

**E (OPBE) = -257.6173990 a.u.**

C -0.29047300 -0.14166800 -0.00000100  
C 0.70484700 -1.12112100 -0.00000700  
H 0.51961900 -2.19649000 -0.00001500  
C 1.96186200 0.84946400 0.00000800  
H 2.85871100 1.46689700 0.00001300

C 2.02401200 -0.53813000 0.00000400  
H 2.93490600 -1.13806400 0.00000500  
C -1.69048300 -0.47790300 -0.00000500  
H -1.91079000 -1.55281900 -0.00001200  
C -2.76284200 0.34757500 -0.00000300  
H -3.77687300 -0.04224100 -0.00000800  
H -2.64468700 1.42656300 0.00000200  
H -0.01099300 2.34290200 0.00001200  
B 0.46971500 1.23679000 0.00000700

## 11

**The number of imaginary frequencies is 0**

**E (OPBE) = -574.0834263 a.u.**

C -0.41737500 0.42596100 0.02999000  
C 0.53634100 1.39852400 -0.01537200  
H 0.29469700 2.45639700 -0.05082400  
C 2.02984800 -0.42420500 0.04285000  
H 2.96650800 -0.96493900 0.03677000  
C 1.90567600 0.92175200 -0.01749000  
H 2.74928100 1.60229500 -0.06277300  
H 0.22336100 -1.67001400 1.23803700  
C -1.84867300 0.66602700 0.05465700  
H -2.13635000 1.71009800 0.16824900  
C -2.81425200 -0.25618500 -0.04151800  
H -3.86046600 0.02087700 -0.00277100  
H -2.59289300 -1.31034700 -0.17286400  
P 0.40043200 -1.21570700 -0.09816900

## 11rad.anion

**The number of imaginary frequencies is 0**

**E (OPBE) = -574.0946659 a.u.**

C -0.41976800 0.43013300 -0.01285700  
C 0.59011100 1.41782700 0.03169900  
H 0.35617400 2.48071500 0.03594900  
C 2.02799900 -0.46190200 -0.01769000  
H 2.95998500 -1.00529400 -0.11060200  
C 1.90876800 0.92552800 0.01696100  
H 2.77170300 1.59010200 -0.00571700  
H 0.16627800 -1.63828000 1.31076100  
C -1.81738400 0.66401400 -0.00615000  
H -2.09239900 1.72353100 0.03287300  
C -2.85454200 -0.23001500 -0.01447700  
H -3.88545700 0.10861200 -0.01025900  
H -2.68588700 -1.30146600 -0.05900800

P 0.38656600 -1.22876200 -0.07859400

## 12

**The number of imaginary frequencies is 0**

**E (OPBE) = -238.9945894 a.u.**

C -0.62198900 0.70851700 0.02710900  
C 0.22524000 1.76662500 -0.01815700  
H -0.13588200 2.79128700 -0.05455500  
C 2.00003200 0.17847800 0.05292700  
H 3.01599100 -0.19298300 0.05109300  
C 1.65199300 1.47734600 -0.01225000  
H 2.38080900 2.28171600 -0.05249200  
H 0.33322600 -1.28124000 1.43776400  
C -2.06717400 0.79883300 0.03679300  
H -2.46620800 1.81113800 0.09731500  
C -2.92950500 -0.22424800 -0.01803500  
H -3.99974500 -0.05968200 0.00034200  
H -2.59519700 -1.25401200 -0.09080600  
As 0.42167900 -0.97968300 -0.05451500

## 12rad.anion

**The number of imaginary frequencies is 0**

**E (OPBE) = -239.0070049 a.u.**

C -0.61937900 0.71496200 -0.00485000  
C 0.29196900 1.78802800 0.02274100  
H -0.05502800 2.82070200 0.02015900  
C 2.01075400 0.12368500 0.00357100  
H 3.01999400 -0.26427900 -0.05059000  
C 1.66668500 1.46660100 0.01710900  
H 2.42210500 2.25308900 -0.00206000  
H 0.26492000 -1.33504000 1.47829300  
C -2.02946200 0.80308300 -0.00934000  
H -2.41132400 1.83078000 -0.00438600  
C -2.97454700 -0.18998900 0.00144000  
H -4.03382000 0.04427600 -0.00846800  
H -2.70021900 -1.24041500 -0.00639900  
As 0.40658300 -0.98022200 -0.04880500

## 13

**The number of imaginary frequencies is 0**

**E (OPBE) = -236.7225007 a.u.**

C 1.00214100 0.75409900 -0.00001400  
C 0.38068000 1.95703700 -0.00001700  
H 0.95774800 2.88134500 -0.00002200

C -1.87224900 0.97121000 -0.00003000  
H -2.95263500 1.04034600 -0.00004000  
C -1.09089200 2.06667200 0.00001600  
H -1.51589900 3.06895700 0.00002300  
C 2.44123500 0.59921400 -0.00002200  
H 3.01944400 1.52461200 -0.00003200  
C 3.10773100 -0.56302200 -0.00001900  
H 4.19037200 -0.59655600 -0.00002900  
H 2.59101400 -1.51810900 -0.00001100  
H -0.65435400 -1.74260500 -1.39202700  
H -0.65434700 -1.74258100 1.39206800  
Sn -0.57586400 -0.75253300 0.00001200

### 13rad.anion

The number of imaginary frequencies is 0

E (OPBE) = -236.7412165 a.u.

C 0.98666900 0.75483100 -0.00000900  
C 0.29588600 1.98373900 -0.00002300  
H 0.86116600 2.91793900 -0.00003400  
C -1.91193900 0.88945300 -0.00002000  
H -2.99443000 0.93236600 -0.00002700  
C -1.12506900 2.03825100 0.00002000  
H -1.59561900 3.02430000 0.00003000  
C 2.39691400 0.61972800 -0.00001600  
H 2.94276900 1.57262300 -0.00003100  
C 3.17214600 -0.50634000 -0.00001200  
H 4.25526400 -0.44547300 -0.00002400  
H 2.73365900 -1.50080100 0.00001000  
H -0.61954200 -1.87136500 -1.34389400  
H -0.61953500 -1.87134900 1.34392500  
Sn -0.55702700 -0.74872400 0.00000800

### 14

The number of imaginary frequencies is 0

E (OPBE) = -236.7411239 a.u.

C 1.35356400 0.71962500 -0.00003700  
C 0.99839700 2.02354700 -0.00003400  
H 1.76165200 2.80140800 -0.00003800  
C -1.42115300 1.57059800 -0.00008400  
H -2.45963700 1.87624100 -0.00011000  
C -0.41137200 2.45530200 0.00004400  
H -0.60035700 3.52763100 0.00006700  
C 2.72539500 0.26106700 -0.00003200  
H 3.48365100 1.04626300 -0.00004500

C 3.13701900 -1.01376600 -0.00003500  
H 4.18972100 -1.26885300 -0.00004700  
H 2.43400100 -1.84103100 -0.00002900  
H -0.85737100 -1.43088300 -1.42916600  
H -0.85734700 -1.43084500 1.42922700  
Pb -0.55348100 -0.48022200 0.00001500

### 14rad.anion

The number of imaginary frequencies is 0

E (OPBE) = -236.7568897 a.u.

C 1.32363000 0.76081800 -0.00000300  
C 0.86447300 2.09029800 0.00002300  
H 1.59680400 2.90006600 0.00002900  
C -1.52703700 1.46983200 0.00008600  
H -2.57983600 1.72259700 0.00012300  
C -0.51880900 2.42209400 -0.00007700  
H -0.77983800 3.48334700 -0.00011500  
C 2.67345800 0.34780000 0.00000300  
H 3.39200600 1.17871300 0.00001500  
C 3.22013300 -0.90840900 -0.00000100  
H 4.29503800 -1.05355700 0.00000700  
H 2.59957200 -1.80027700 -0.00001000  
H -0.82988300 -1.58379900 -1.38647300  
H -0.82986600 -1.58381100 1.38646200  
Pb -0.52535500 -0.49216900 -0.00000300

### 15

The number of imaginary frequencies is 0

E (OPBE) = -234.6094881 a.u.

C 1.00955100 0.70429000 -0.00006100  
C 0.36504600 1.89390800 -0.00013500  
H 0.92100800 2.83327200 -0.00003200  
C -1.92466400 0.91872800 0.00015900  
H -3.00086500 1.04829400 0.00012100  
C -1.11923700 1.99943200 -0.00004400  
H -1.52407900 3.01203200 -0.00017600  
C 2.45365800 0.59819000 0.00015100  
H 3.01010400 1.53837700 0.00045500  
C 3.15178000 -0.54675400 -0.00004900  
H 4.23531800 -0.55283700 0.00007100  
H 2.65591200 -1.51299900 -0.00029900  
H -0.72350600 -2.48368900 0.00004900  
In -0.59572900 -0.76100500 -0.00000600

### 15rad.anion

The number of imaginary frequencies is 0

E (OPBE) = -234.6428332 a.u.

C 1.04901900 0.62455400 0.04102200  
C 0.50067400 1.87779600 0.00384700  
H 1.14723700 2.76415600 -0.04783300  
C -1.83170600 1.07953300 0.06997300  
H -2.89326700 1.32796000 0.03821700  
C -0.94223500 2.10895700 0.00584800  
H -1.26563900 3.15434400 -0.05708800  
C 2.48832700 0.48414200 0.03592400  
H 3.05998200 1.42210800 0.08419500  
C 3.20503500 -0.65503200 -0.01406500  
H 4.29102200 -0.64492400 -0.00779200  
H 2.71603000 -1.62330400 -0.06526500  
H -0.89044100 -2.17194600 1.03753500  
In -0.67305300 -0.76220600 -0.03749500

### 16

The number of imaginary frequencies is 0

E (OPBE) = -234.6667293 a.u.

C -1.33914400 0.71044700 0.00002400  
C -0.94761800 2.00226000 0.00002600  
H -1.68252100 2.80894800 0.00003500  
C 1.48406400 1.50453700 0.00002400  
H 2.51743400 1.83097200 0.00002200  
C 0.48310700 2.40179400 0.00001400  
H 0.68238700 3.47366800 0.00001500  
C -2.72804400 0.30670500 0.00003000  
H -3.46436000 1.11433900 0.00003800  
C -3.18111700 -0.95543100 0.00002700  
H -4.24136100 -1.17879100 0.00003200  
H -2.50072000 -1.80164100 0.00002000  
H 1.01787000 -2.13468500 -0.00005800  
Tl 0.55609600 -0.49302100 -0.00001200

### 16rad.anion

The number of imaginary frequencies is 0

E (OPBE) = -234.6968727 a.u.

C 1.42896200 0.58108700 0.04515900  
C 1.18332600 1.91824200 0.00965000  
H 2.01768900 2.63252500 -0.03652800  
C -1.27725700 1.71353500 0.06325700  
H -2.24809000 2.21026800 0.02085700

C -0.16833000 2.48804300 0.00624800  
H -0.22691600 3.58158300 -0.05342400  
C 2.79404700 0.10670600 0.03209500  
H 3.57293500 0.88315000 0.06839900  
C 3.21699500 -1.17024700 -0.01560600  
H 4.27402600 -1.41993500 -0.01948100  
H 2.50885800 -1.99219900 -0.05545300  
H -1.12899000 -1.64665900 1.24165000  
Tl -0.63995000 -0.47003600 -0.02482500

### 17

The number of imaginary frequencies is 0

E (OPBE) = -238.2088348 a.u.

C -0.94805900 0.79585300 0.02026200  
C -0.32360100 1.99806700 -0.01258900  
H -0.89622200 2.92404000 -0.03608600  
C 1.84451300 0.92081300 0.04004100  
H 2.92678200 0.89360500 0.03334700  
C 1.13475800 2.06294500 -0.01018100  
H 1.61806200 3.03718000 -0.04167000  
H 0.52802800 -1.03143000 1.65793200  
C -2.38673800 0.63226400 0.02606900  
H -2.95974500 1.55944800 0.06793800  
C -3.05849400 -0.52579300 -0.01294000  
H -4.14114500 -0.55139500 -0.00139400  
H -2.54979700 -1.48349700 -0.06315600  
Sb 0.54705400 -0.79711500 -0.03766400

### 17rad.anion

The number of imaginary frequencies is 0

E (OPBE) = -238.2255264 a.u.

C -0.93092700 0.80608300 0.00747600  
C -0.23416300 2.02849100 0.02932300  
H -0.78779900 2.96886900 0.02789100  
C 1.88335300 0.83957700 -0.01034900  
H 2.96355700 0.77896000 -0.06631400  
C 1.17926900 2.03519300 0.01342400  
H 1.70600800 2.99172700 -0.00474600  
H 0.47837100 -1.15360500 1.70005500  
C -2.33865300 0.66302700 -0.00639700  
H -2.88268400 1.61608600 -0.00070300  
C -3.11399600 -0.46482700 -0.01030400  
H -4.19685500 -0.40223900 -0.02512600  
H -2.67695600 -1.45933800 -0.01754000

Sb 0.52406000 -0.79972000 -0.03436400

## 18

**The number of imaginary frequencies is 0**

**E (OPBE) = -238.1684833 a.u.**

C -1.35086900 0.72808000 0.02168200

C -1.03727500 2.04381800 -0.01013500

H -1.82490900 2.79720600 -0.03661800

C 1.36033500 1.60530500 0.03936200

H 2.40462800 1.89373900 0.03790700

C 0.35360400 2.49386500 -0.00495000

H 0.54460900 3.56590800 -0.03150300

H 0.60864300 -0.69639600 1.78007100

C -2.70535100 0.21966500 0.01269300

H -3.48894600 0.97956500 0.01808800

C -3.07493300 -1.06790400 -0.00015900

H -4.11864200 -1.35709500 -0.00476000

H -2.34667900 -1.87323300 -0.00690300

Bi 0.56564100 -0.49935800 -0.02538800

## 18rad.anion

**The number of imaginary frequencies is 0**

**E (OPBE) = -238.1844724 a.u.**

C -1.31531000 0.76687400 0.00418300

C -0.91624700 2.11202200 0.02596400

H -1.67779700 2.89516100 0.03267600

C 1.45152300 1.51334500 -0.00884600

H 2.50962300 1.74904600 0.01183700

C 0.45248300 2.47145700 0.02143400

H 0.70962300 3.53399800 0.02914700

H 0.61014700 -0.90420300 1.83333900

C -2.65197400 0.30304800 -0.01726000

H -3.39974800 1.10659700 -0.05276000

C -3.15068300 -0.97034100 0.00937000

H -4.21901300 -1.15612800 -0.01638300

H -2.49936200 -1.83877600 0.05332100

Bi 0.53913000 -0.51282100 -0.02530400

## 19

**The number of imaginary frequencies is 0**

**E (OPBE) = -467.9754746 a.u.**

C 0.48435900 1.83495300 0.00000000

C -0.75974300 0.98787900 0.00000000

C -0.83801600 -0.35673800 0.00000000

C 0.42400500 -1.22761600 0.00000000

C 1.67190000 -0.36777800 0.00000000

C 1.71015100 0.95964700 0.00000000

H -1.69142900 1.55197100 0.00000000

H 2.60576100 -0.92653300 0.00000000

H 2.66989300 1.47217000 0.00000000

C -2.19704300 -0.92649000 0.00000000

H -2.97053700 -0.16033600 0.00000000

C -2.62187400 -2.19518800 0.00000000

H -1.96561100 -3.05408700 0.00000000

H -3.68448000 -2.40917800 0.00000000

C 0.48923500 -2.11552600 1.27092200

H 0.46075000 -1.49630100 2.17036600

H -0.33469100 -2.82680700 1.32437600

H 1.42508500 -2.68272700 1.28041000

C 0.48923500 -2.11552600 -1.27092200

H -0.33469100 -2.82680700 -1.32437600

H 0.46075000 -1.49630100 -2.17036600

H 1.42508500 -2.68272700 -1.28041000

C 0.48923500 2.73884500 1.25885800

H 1.37983300 3.37497400 1.27127200

H -0.38975000 3.39083400 1.27236400

H 0.48493200 2.13711100 2.17018900

C 0.48923500 2.73884500 -1.25885800

H -0.38975000 3.39083400 -1.27236400

H 1.37983300 3.37497400 -1.27127200

H 0.48493200 2.13711100 -2.17018900

## 19rad.anion

**The number of imaginary frequencies is 0**

**E (OPBE) = -467.9606072 a.u.**

C 1.89869500 -0.24233300 0.00023700

C 0.67479600 -1.11187600 0.00363600

C -0.67210200 -0.69034600 0.00075100

C -0.97888700 0.81430500 0.00007500

C 0.27276600 1.66364800 -0.00022900

C 1.52724900 1.21854600 -0.00032200

H 0.86990300 -2.18437800 0.00470300

H 0.09305900 2.74072900 -0.00070600

H 2.35370400 1.93125800 -0.00089900

C -1.72482100 -1.64175800 0.00011500

H -1.34988200 -2.66954200 0.00026700

C -3.11817800 -1.55256200 -0.00009300

H -3.67904500 -0.62655700 -0.00009500

H -3.70973100 -2.46300600 -0.00031100  
C -1.77947200 1.20930600 -1.27032600  
H -1.17345500 1.01705000 -2.15991700  
H -2.69684900 0.62424800 -1.35641200  
H -2.04086200 2.27693400 -1.25698400  
C -1.77958700 1.20978100 1.27030300  
H -2.69687800 0.62456700 1.35642700  
H -1.17349600 1.01786200 2.15990400  
H -2.04112000 2.27738300 1.25665900  
C 2.77690200 -0.52071400 -1.25564300  
H 3.69474600 0.08800800 -1.26847000  
H 3.07359100 -1.57543700 -1.27816500  
H 2.20655600 -0.31189300 -2.16356000  
C 2.78194800 -0.51862100 1.25284600  
H 3.07838300 -1.57339700 1.27618700  
H 3.70001800 0.08981100 1.26049200  
H 2.21551800 -0.30790700 2.16279000

C 2.41587500 -0.20587300 0.00005300  
H -0.19697900 2.31500400 0.00004600  
H 2.07980800 -2.30810200 -0.00002800  
H 3.50203300 -0.35777900 0.00011400  
C -2.00318500 0.46450500 -0.00010600  
H -2.28622200 1.52242800 -0.00049800  
C -3.00887300 -0.42823300 0.00016700  
H -2.82124200 -1.49600100 0.00050800  
H -4.04595400 -0.10461600 0.00004500  
H -0.61293000 -2.18939500 -0.00022900  
H 2.51703000 2.19306700 0.00014300  
B 0.07595700 -1.19517600 -0.00011800  
B 1.81146900 1.20720900 0.00007100

## 20

**The number of imaginary frequencies is 0**

**E (OPBE) = -283.0063489 a.u.**

C -0.25189500 -1.35878500 0.02163500  
C 0.57859200 -0.27552900 0.01126200  
C -1.62757200 1.32167300 -0.04013200  
C -2.42519700 0.23036800 -0.03002700  
H 0.20150200 -2.35196900 0.02094400  
H -2.07579500 2.31464300 -0.07642200  
H -3.50735700 0.36028400 -0.05882200  
C 2.02865100 -0.46959500 -0.02033300  
H 2.36140300 -1.50692600 -0.04905500  
C 2.96058500 0.49417300 -0.02699500  
H 2.70370600 1.54565300 0.00284600  
H 4.01555100 0.24774500 -0.06027700  
H 0.59200200 2.13050000 0.24626300  
H -2.49740600 -2.17082800 0.03312400  
B -0.08110400 1.16144500 0.07181800  
B -1.79341300 -1.20603100 0.01797000

## 20rad.anion

**The number of imaginary frequencies is 0**

**E (OPBE) = -283.0811366 a.u.**

C 0.28685300 1.32894800 0.00001400  
C -0.55662700 0.22190100 -0.00007700  
C 1.60384600 -1.32037600 -0.00002800
